# Supplementary material for: Differences in Extracellular Vesicle Protein Cargo Are Dependent on Head and Neck Squamous Cell Carcinoma Cell of Origin and Human Papillomavirus Status
Source: MDPI journal article supplement (doi:10.3390/cancers13153714), 2021-07-23
Supplement: s1 [file s1]

**Table S2.** Wes protein intensity values for Figure 3. Bold italics: HPV-positive.

| Sample                        | Average Protein Intensity (Luminescence) |          |          |
|-------------------------------|------------------------------------------|----------|----------|
|                               | AnnexinV                                 | Calnexin | CD9      |
| UM-SCC-38 EV                  | 37549.0                                  | 0.0      | 271208.4 |
| <b><i>UM-SCC-47 EV</i></b>    | 110471.0                                 | 0.0      | 17804.1  |
| UM-SCC-118 EV                 | 26844.3                                  | 0.0      | 44270.8  |
| <b><i>UM-SCC-104 EV</i></b>   | 47951.1                                  | 0.0      | 40871.1  |
| UM-SCC-17A EV                 | 26217.7                                  | 0.0      | 132878.9 |
| <b><i>UM-SCC-105 EV</i></b>   | 24363.8                                  | 0.0      | 133820.5 |
| UM-SCC-92 EV                  | 50674.7                                  | 0.0      | 42688.4  |
| <b><i>UPCISCC:152 EV</i></b>  | 29584.3                                  | 0.0      | 137184.8 |
| NOKsi EV                      | 6837.7                                   | 0.0      | 13536.0  |
| HOK16b EV                     | 9839.3                                   | 0.0      | 13412.5  |
| HOKg EV                       | 5411.7                                   | 454.3    | 1147.1   |
| UM-SCC-38 WCL                 | 192031.6                                 | 59254.7  | 7835.5   |
| <b><i>UM-SCC-47 WCL</i></b>   | 243144.6                                 | 26621.2  | 2833.6   |
| UM-SCC-118 WCL                | 288892.6                                 | 38561.5  | 6252.5   |
| <b><i>UM-SCC-104 WCL</i></b>  | 475389.2                                 | 18504.3  | 27982.8  |
| UM-SCC-17A WCL                | 355077.5                                 | 28261.6  | 21663.3  |
| <b><i>UM-SCC-105 WCL</i></b>  | 271650.0                                 | 41279.2  | 8378.6   |
| UM-SCC-92 WCL                 | 317918.0                                 | 15292.3  | 3220.7   |
| <b><i>UPCISCC:152 WCL</i></b> | 175005.0                                 | 55347.7  | 15616.3  |
| NOKsi WCL                     | 303760.3                                 | 29611.0  | 5811.2   |
| HOK16b WCL                    | 326741.6                                 | 174614.4 | 1394.2   |
| HOKg WCL                      | 221713.7                                 | 22730.3  | 11219.1  |
