# Supplementary material for: Differences in Extracellular Vesicle Protein Cargo Are Dependent on Head and Neck Squamous Cell Carcinoma Cell of Origin and Human Papillomavirus Status
Source: MDPI journal article supplement (doi:10.3390/cancers13153714), 2021-07-23
Supplement: s1 [file s1]

**Table S3.** Wes protein intensity values for Figure 8. Bold italics: HPV-positive.

| Sample                        | Average Protein Intensity (Luminescence) |          |           |          |         |
|-------------------------------|------------------------------------------|----------|-----------|----------|---------|
|                               | RB                                       | p53      | Cyclin D1 | p16      | HPV16E7 |
| UM-SCC-38 EV                  | 0.0                                      | 0.0      | 0.0       | 0.0      | 0.0     |
| <b><i>UM-SCC-47 EV</i></b>    | 0.0                                      | 0.0      | 0.0       | 0.0      | 0.0     |
| UM-SCC-118 EV                 | 0.0                                      | 0.0      | 0.0       | 0.0      | 0.0     |
| <b><i>UM-SCC-104 EV</i></b>   | 0.0                                      | 0.0      | 0.0       | 0.0      | 0.0     |
| UM-SCC-17A EV                 | 0.0                                      | 0.0      | 0.0       | 0.0      | 0.0     |
| <b><i>UM-SCC-105 EV</i></b>   | 0.0                                      | 0.0      | 0.0       | 170.8    | 0.0     |
| UM-SCC-92 EV                  | 0.0                                      | 0.0      | 0.0       | 0.0      | 0.0     |
| <b><i>UPCISCC:152 EV</i></b>  | 0.0                                      | 0.0      | 0.0       | 155.5    | 0.0     |
| NOKsi EV                      | 0.0                                      | 0.0      | 0.0       | 0.0      | 0.0     |
| HOK16b EV                     | 0.0                                      | 0.0      | 0.0       | 0.0      | 0.0     |
| HOKg EV                       | 0.0                                      | 0.0      | 0.0       | 0.0      | 0.0     |
| UM-SCC-38 WCL                 | 57226.5                                  | 28991.9  | 19889.6   | 0.0      | 0.0     |
| <b><i>UM-SCC-47 WCL</i></b>   | 36356.6                                  | 0.0      | 0.0       | 4258.6   | 4411.2  |
| UM-SCC-118 WCL                | 41300.8                                  | 3058.8   | 17562.9   | 0.0      | 0.0     |
| <b><i>UM-SCC-104 WCL</i></b>  | 69298.5                                  | 0.0      | 3431.0    | 23571.0  | 13757.2 |
| UM-SCC-17A WCL                | 33284.1                                  | 24008.6  | 9012.2    | 0.0      | 0.0     |
| <b><i>UM-SCC-105 WCL</i></b>  | 18610.4                                  | 0.0      | 8403.9    | 27884.8  | 0.0     |
| UM-SCC-92 WCL                 | 6964.8                                   | 0.0      | 86235.8   | 5178.9   | 0.0     |
| <b><i>UPCISCC:152 WCL</i></b> | 7838.9                                   | 0.0      | 0.0       | 29703.8  | 8416.9  |
| NOKsi WCL                     | 59121.6                                  | 181244.4 | 8326.7    | 264.0    | 138.8   |
| HOK16b WCL                    | 195370.8                                 | 0.0      | 1268.2    | 164660.3 | 1462.1  |
| HOKg WCL                      | 9075.3                                   | 5151.9   | 15222.3   | 11675.8  | 0.0     |
