# Supplementary material for: Differences in Extracellular Vesicle Protein Cargo Are Dependent on Head and Neck Squamous Cell Carcinoma Cell of Origin and Human Papillomavirus Status
Source: MDPI journal article supplement (doi:10.3390/cancers13153714), 2021-07-23
Supplement: s1 [file s1]

**Table S1.** Proteins from HNSCC cell line EVs with averaged fold-change peptide spectrum matches (PSM) >2 compared to the EVs from the normal keratinocyte line (NOKsi) (n=149)

| Accession ID | Protein                                                      |
|--------------|--------------------------------------------------------------|
| O75508       | Claudin-11                                                   |
| Q9NRW3       | DNA dC->dU-editing enzyme APOBEC-3C                          |
| A0A1B0GUN9   | Espin                                                        |
| Q6UXH8       | Collagen and calcium-binding EGF domain-containing protein 1 |
| O15446       | DNA-directed RNA polymerase I subunit RPA34                  |
| Q9H7N4       | Splicing factor, arginine/serine-rich 19                     |
| Q96QC0       | Serine/threonine-protein phosphatase 1 regulatory subunit 10 |
| O15523       | ATP-dependent RNA helicase DDX3Y                             |
| O75781       | Paralemmin-1                                                 |
| O15551       | Claudin-3                                                    |
| E9PDY6       | Mucin-4                                                      |
| O60711       | Leupaxin                                                     |
| Q9HCE6       | Rho guanine nucleotide exchange factor 10-like protein       |
| F5H550       | C-type lectin domain family 18 member C                      |
| A0A0A6YYL4   | Coronin                                                      |
| P15169       | Carboxypeptidase N catalytic chain                           |
| A0A1W2PRA1   | Stromal interaction molecule 2                               |
| Q8N142       | Adenylosuccinate synthetase isozyme 1                        |
| Q9H8M2       | Bromodomain-containing protein 9                             |
| P02765       | Alpha-2-HS-glycoprotein                                      |
| P82932       | 28S ribosomal protein S6, mitochondrial                      |
| Q9ULT0       | Tetratricopeptide repeat protein 7A                          |
| P36955       | Pigment epithelium-derived factor                            |
| J3KMX3       | Alpha-fetoprotein                                            |
| Q9H4B7       | Tubulin beta-1 chain                                         |
| P01023       | Alpha-2-macroglobulin                                        |
| P02042       | Hemoglobin subunit delta                                     |
| P20742       | Pregnancy zone protein                                       |
| P04745       | Alpha-amylase 1                                              |
| E9PGA6       | C1QTNF3-AMACR readthrough (NMD candidate)                    |
| P51884       | Lumican                                                      |
| P10620       | Microsomal glutathione S-transferase 1                       |
| Q06033       | Inter-alpha-trypsin inhibitor heavy chain H3                 |
| Q92743       | Serine protease HTRA1                                        |
| Q96DE0       | U8 snoRNA-decapping enzyme                                   |
| P08263       | Glutathione S-transferase A1                                 |
| O60636       | Tetraspanin-2                                                |
| Q6PCB0       | von Willebrand factor A domain-containing protein 1          |

|            |                                                               |
|------------|---------------------------------------------------------------|
| P39059     | Collagen alpha-1(XV) chain                                    |
| P42771     | Cyclin-dependent kinase inhibitor 2A                          |
| P36021     | Monocarboxylate transporter 8                                 |
| P16219     | Short-chain specific acyl-CoA dehydrogenase, mitochondrial    |
| Q14210     | Lymphocyte antigen 6D                                         |
| G3V2W1     | Protein Z-dependent protease inhibitor                        |
| A0A0A0MRJ7 | Coagulation factor V                                          |
| P02538     | Keratin, type II cytoskeletal 6A                              |
| O95183     | Vesicle-associated membrane protein 5                         |
| P00734     | Prothrombin                                                   |
| Q8WWB7     | Glycosylated lysosomal membrane protein                       |
| Q6UXB3     | Ly6/PLAUR domain-containing protein 2                         |
| Q8NFJ5     | Retinoic acid-induced protein 3                               |
| P04004     | Vitronectin                                                   |
| A0A0C4DFN2 | Glucokinase (Hexokinase 4) regulator                          |
| P01266     | Thyroglobulin                                                 |
| Q8WXI7     | Mucin-16                                                      |
| Q14520     | Hyaluronan-binding protein 2                                  |
| P18463     | HLA class I histocompatibility antigen, B-37 alpha chain      |
| A4D126     | D-ribitol-5-phosphate cytidyltransferase                      |
| P05543     | Thyroxine-binding globulin                                    |
| Q7RTV2     | Glutathione S-transferase A5                                  |
| E7ESC7     | Macrophage erythroblast attacher                              |
| P00488     | Coagulation factor XIII A chain                               |
| P62318     | Small nuclear ribonucleoprotein Sm D3                         |
| Q15847     | Adipogenesis regulatory factor                                |
| P00742     | Coagulation factor X                                          |
| P19971     | Thymidine phosphorylase                                       |
| O00339     | Matrilin-2                                                    |
| A0A087WXL6 | Vacuolar protein sorting 11 (Yeast), isoform CRA_a            |
| O75340     | Programmed cell death protein 6                               |
| Q9BZD6     | Transmembrane gamma-carboxyglutamic acid protein 4            |
| Q9P0J7     | E3 ubiquitin-protein ligase KCMF1                             |
| Q8NFL0     | UDP-GlcNAc:betaGal beta-1,3-N-acetylglucosaminyltransferase 7 |
| Q14117     | Dihydropyrimidinase                                           |
| P13647     | Keratin, type II cytoskeletal 5                               |
| Q6V0I7     | Protocadherin Fat 4                                           |
| P04114     | Apolipoprotein B-100                                          |
| B7ZL91     | Meprin A subunit                                              |
| Q9GZN4     | Brain-specific serine protease 4                              |
| A8K0G1     | Protein Wnt                                                   |

|        |                                                                      |
|--------|----------------------------------------------------------------------|
| O95873 | Uncharacterized protein C6orf47                                      |
| Q9HB40 | Retinoid-inducible serine carboxypeptidase                           |
| P35625 | Metalloproteinase inhibitor 3                                        |
| O15393 | Transmembrane protease serine 2                                      |
| Q7Z406 | Myosin-14                                                            |
| P01024 | Complement C3                                                        |
| F8WAL6 | Abl interactor 2                                                     |
| Q8N271 | Prominin-2                                                           |
| P35321 | Cornifin-A                                                           |
| Q96PE2 | Rho guanine nucleotide exchange factor 17                            |
| P35443 | Thrombospondin-4                                                     |
| P09758 | Tumor-associated calcium signal transducer 2                         |
| Q5UIP0 | Telomere-associated protein RIF1                                     |
| Q75QN2 | Integrator complex subunit 8                                         |
| P20908 | Collagen alpha-1(V) chain                                            |
| Q04695 | Keratin, type I cytoskeletal 17                                      |
| P43121 | Cell surface glycoprotein MUC18                                      |
| P98160 | Basement membrane-specific heparan sulfate proteoglycan core protein |
| O95832 | Claudin-1                                                            |
| P02533 | Keratin, type I cytoskeletal 14                                      |
| Q17RR3 | Pancreatic lipase-related protein 3                                  |
| P10643 | Complement component C7                                              |
| P08727 | Keratin, type I cytoskeletal 19                                      |
| P05362 | Intercellular adhesion molecule 1                                    |
| Q8IYM9 | E3 ubiquitin-protein ligase TRIM22                                   |
| P05187 | Alkaline phosphatase, placental type                                 |
| O43653 | Prostate stem cell antigen                                           |
| Q76M96 | Coiled-coil domain-containing protein 80                             |
| P05787 | Keratin, type II cytoskeletal 8                                      |
| Q96N76 | Urocanate hydratase                                                  |
| P47929 | Galectin-7                                                           |
| G3V1A6 | Gasdermin domain containing 1, isoform CRA_d                         |
| Q9NRL3 | Striatin-4                                                           |
| P29317 | Ephrin type-A receptor 2                                             |
| Q9Y4P3 | Transducin beta-like protein 2                                       |
| Q8WWY8 | Lipase member H                                                      |
| Q68BL7 | Olfactomedin-like protein 2A                                         |
| B0YIW2 | Apolipoprotein C-III variant 1                                       |
| P01891 | HLA class I histocompatibility antigen, A-68 alpha chain             |
| P09668 | Pro-cathepsin H                                                      |
| Q9Y337 | Kallikrein-5                                                         |

|            |                                                         |
|------------|---------------------------------------------------------|
| Q9UBP6     | tRNA (guanine-N(7)-)-methyltransferase                  |
| Q9BSE2     | Transmembrane protein 79                                |
| Q9BUF5     | Tubulin beta-6 chain                                    |
| A1A4S6     | Rho GTPase-activating protein 10                        |
| Q5JPI3     | Uncharacterized protein C3orf38                         |
| Q8NI27     | THO complex subunit 2                                   |
| Q14678     | KN motif and ankyrin repeat domain-containing protein 1 |
| P19823     | Inter-alpha-trypsin inhibitor heavy chain H2            |
| O00469     | Procollagen-lysine,2-oxoglutarate 5-dioxygenase 2       |
| Q99715     | Collagen alpha-1(XII) chain                             |
| P63172     | Dynein light chain Tctex-type 1                         |
| Q9Y4K0     | Lysyl oxidase homolog 2                                 |
| Q3KQV9     | UDP-N-acetylhexosamine pyrophosphorylase-like protein 1 |
| Q9GZT5     | Protein Wnt-10a                                         |
| Q9Y478     | 5'-AMP-activated protein kinase subunit beta-1          |
| P13646     | Keratin, type I cytoskeletal 13                         |
| O15232     | Matrilin-3                                              |
| O15347     | High mobility group protein B3                          |
| Q6PJI9     | GATOR complex protein WDR59                             |
| P18510     | Interleukin-1 receptor antagonist protein               |
| Q5BKZ1     | DBIRD complex subunit ZNF326                            |
| A0A0J9YXF2 | Paraoxonase 2, isoform CRA_a                            |
| P29508     | Serpin B3                                               |
| Q14573     | Inositol 1,4,5-trisphosphate receptor type 3            |
| P27482     | Calmodulin-like protein 3                               |
| Q9UHV7     | Mediator of RNA polymerase II transcription subunit 13  |
| Q12884     | Prolyl endopeptidase FAP                                |
| Q9HB63     | Netrin-4                                                |
