# Supplementary material for: Differences in Extracellular Vesicle Protein Cargo Are Dependent on Head and Neck Squamous Cell Carcinoma Cell of Origin and Human Papillomavirus Status
Source: MDPI journal article supplement (doi:10.3390/cancers13153714), 2021-07-23
Supplement: s1 [file s1]

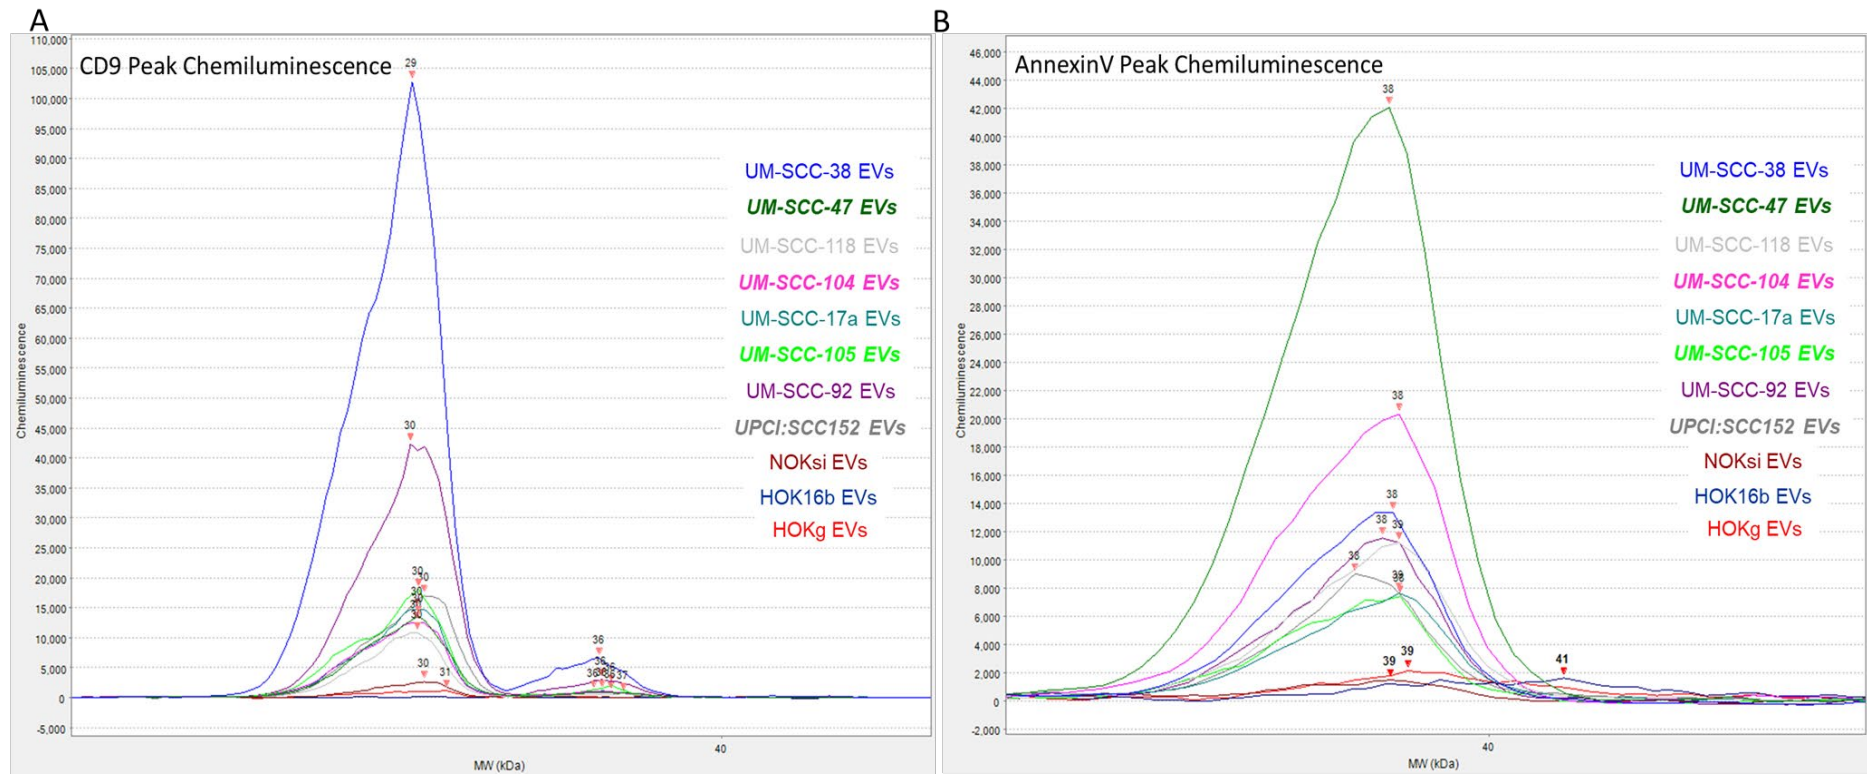

**Figure S1.** Wes protein quantitative luminosity for extracellular vesicles from HNSCC, normal keratinocyte, and transformed cell lines. (A) CD9 detected at 30kDa, 1:25 antibody dilution, 1 $\mu$ g/ $\mu$ L protein (B) AnnexinV detected at 38kDa, 1:200 antibody dilution, 0.25  $\mu$ g/ $\mu$ L protein.
